# Supplementary material for: Head CT Scans in the Emergency Department during the COVID-19 Pandemic: Use or Overuse?
Source: MDPI journal article supplement (doi:10.3390/life14020264), 2024-02-17
Supplement: s1 [file s1]

Table S1. The table presents absolute and relative frequencies of the three main diagnoses in relation to symptoms, in the three period: control, covid, and vaccine period.

| Control Period (2018-2019) |                          |                   |                     |
|----------------------------|--------------------------|-------------------|---------------------|
| Symptom                    | Cerebral vein thrombosis | Ischemic Stroke   | Cerebral Hemorrhage |
| Neurological deficit       | 6/16 (37.5%)             | 1052/1576 (66.8%) | 237/985 (24.1%)     |
| Alt. Consciousness         | 0/16 (0)                 | 91/1576 (5.8%)    | 129/985 (13.1%)     |

| COVID PERIOD         |                          |                 |                     |
|----------------------|--------------------------|-----------------|---------------------|
| Symptom              | Cerebral vein thrombosis | Ischemic Stroke | Cerebral Hemorrhage |
| Neurological deficit | 4/7 (57.1%)              | 287/470 (61.1%) | 88/358 (24.6%)      |
| Alt. Consciousness   | 1/7 (14.3%)              | 52/470 (11.1%)  | 87/358 (24.3%)      |

| VACCINE PERIOD       |                          |                 |                     |
|----------------------|--------------------------|-----------------|---------------------|
| Symptom              | Cerebral vein thrombosis | Ischemic Stroke | Cerebral Hemorrhage |
| Neurological deficit | 2/13 (15.4%)             | 226/398 (56.8%) | 72/249 (28.9%)      |
| Alt. Consciousness   | 1/13 (7.7%)              | 60/398 (15.1%)  | 46/249 (18.5%)      |

Table S2. The table shows extended analysis from Logistic Regression Results For Head CT Scan Prescription showed in Table 2 in the main manuscript.

**Logistic Regression Results For Head CT Scan Prescription (Table 2 in the main manuscript)**

| Variable                    | Beta   | Standard Error | Wald Statistic | p-value | Odds Ratio       | 95% CI (low) | 95% CI (High) |
|-----------------------------|--------|----------------|----------------|---------|------------------|--------------|---------------|
| Age                         | .011   | .001           | 399.718        | <0.001  | 1.011            | 1.010        | 1.012         |
| Sex (M)                     | .067   | .018           | 13.835         | <0.001  | 1.064            | 1.032        | 1.108         |
| Control period              |        |                | 69.232         | <0.001  | <i>Reference</i> |              |               |
| • COVID-19 period           | .167   | .022           | 58.382         | <0.001  | 1.182            | 1.132        | 1.234         |
| • Vaccine Period            | -.025  | .024           | 1.066          | 0.302   | .975             | .930         | 1.023         |
| High priority Triage        | 1.353  | .028           | 2350.993       | <0.001  | 3.867            | 3.661        | 4.085         |
| Access by EMS               | .988   | .021           | 2298.139       | <0.001  | 2.685            | 2.579        | 2.796         |
| Neurological deficit        | 2.558  | .028           | 8276.366       | <0.001  | 12.907           | 12.215       | 13.639        |
| Alteration of Consciousness | 2.159  | .043           | 2488.131       | <0.001  | 8.665            | 7.960        | 9.432         |
| Epilepsy                    | 1.389  | .040           | 1230.057       | <0.001  | 4.012            | 3.713        | 4.336         |
| Confusion                   | 2.849  | .043           | 4410.431       | <0.001  | 17.267           | 15.875       | 18.782        |
| Headache                    | 2.666  | .029           | 8402.121       | <0.001  | 14.389           | 13.591       | 15.233        |
| Sensitivity disorders       | 1.128  | .045           | 637.347        | <0.001  | 3.090            | 2.831        | 3.373         |
| Vertigo/dizziness           | 2.122  | .037           | 3333.179       | <0.001  | 8.349            | 7.769        | 8.973         |
| Malaise/fatigue             | .664   | .025           | 727.881        | <0.001  | 1.943            | 1.852        | 2.039         |
| Vomit                       | .119   | .031           | 15.049         | <0.001  | 1.126            | 1.061        | 1.196         |
| Syncope/pre-syncope         | 1.442  | .029           | 2413.547       | <0.001  | 4.228            | 3.992        | 4.479         |
| Cerebrovascular disease     | .360   | .035           | 104.273        | <0.001  | 1.433            | 1.337        | 1.535         |
| Peripheral vascular disease | -.603  | .030           | 409.842        | <0.001  | .547             | .516         | .580          |
| Hypertension                | .273   | .021           | 164.038        | <0.001  | 1.314            | 1.260        | 1.370         |
| Lipid disorders             | -.020  | .032           | .376           | 0.540   | .981             | .921         | 1.044         |
| Diabetes (no)               | .013   | .030           | .177           | 0.674   | 1.013            | .955         | 1.074         |
| Chronic kidney disease      | -.521  | .039           | 175.696        | <0.001  | .594             | .550         | .641          |
| Anticoagulant therapy       | .375   | .046           | 66.832         | <0.001  | 1.454            | 1.330        | 1.591         |
| Antiplatelet therapy        | .236   | .032           | 53.737         | <0.001  | 1.266            | 1.189        | 1.348         |
| Constant                    | -4.083 | .048           | 7109.631       | <0.001  | .017             |              |               |

Table S3. The table shows extended analysis from Logistic Regression Results For Contrast Head CT Scan Prescription showed in Table 3 in the main manuscript

**Logistic regression results. Contrast Head CT scan prescription (Main manuscript Table 3)**

| Variable                    | Beta   | Standard Error | Wald Statistic | <i>p</i> -value | Odds Ratio | 95% CI (low) | 95% CI (High) |
|-----------------------------|--------|----------------|----------------|-----------------|------------|--------------|---------------|
| Age                         | .007   | .001           | 25.838         | .000            | 1.007      | 1.004        | 1.009         |
| Control period              |        |                | 30.709         | .000            |            |              |               |
| • COVID-19 period           | .101   | .053           | 3.607          | .057            | 1.107      | .997         | 1.229         |
| • Vaccine Period            | .301   | .054           | 30.691         | .000            | 1.339      | 1.197        | 1.498         |
| High priority Triage        | 2.740  | .052           | 2780.510       | .000            | 15.542     | 14.035       | 17.212        |
| Access by EMS               | .518   | .051           | 104.141        | .000            | 1.674      | 1.515        | 1.849         |
| Neurological deficit        | 2.421  | .045           | 2865.670       | .000            | 11.252     | 10.297       | 12.294        |
| Alteration of Consciousness | .240   | .076           | 9.848          | .002            | 1.271      | 1.094        | 1.477         |
| Epilepsy                    | -.248  | .097           | 6.540          | .011            | .780       | .645         | .944          |
| Confusion                   | .507   | .078           | 42.109         | .000            | 1.660      | 1.425        | 1.935         |
| Headache                    | 1.662  | .064           | 671.063        | .000            | 5.270      | 4.648        | 5.977         |
| Sensitivity disorders       | .712   | .089           | 63.417         | .000            | 2.038      | 1.710        | 2.428         |
| Vertigo/dizziness           | .750   | .092           | 66.335         | .000            | 2.117      | 1.768        | 2.536         |
| Malaise/fatigue             | .388   | .065           | 35.405         | .000            | 1.475      | 1.297        | 1.676         |
| Syncope/pre-syncope         | -.143  | .082           | 2.990          | .084            | .863       | .734         | 1.014         |
| Cerebrovascular disease     | .190   | .071           | 7.169          | .007            | 1.210      | 1.052        | 1.391         |
| Peripheral vascular disease | -.981  | .377           | 6.765          | .009            | .375       | .179         | .785          |
| Hypertension                | .251   | .049           | 26.014         | .000            | 1.285      | 1.167        | 1.415         |
| History of CAD              | .519   | .382           | 1.846          | .174            | 1.680      | .795         | 3.551         |
| Diabetes                    | -.141  | .071           | 3.909          | .048            | .868       | .755         | .999          |
| Chronic kidney disease      | -1.033 | .132           | 61.069         | .000            | .356       | .275         | .461          |
| Anticoagulant therapy       | .538   | .091           | 34.695         | .000            | 1.712      | 1.432        | 2.048         |
| Antiplatelet therapy        | .091   | .073           | 1.546          | .214            | 1.095      | .949         | 1.264         |
| Constant                    | -6.385 | .091           | 4915.226       | .000            | .002       |              |               |
